# Supplementary material for: Association of Changes in Smoking Intensity With Risk of Dementia in Korea
Source: PubMed Central journal article supplement (PMC9857334; doi:10.1001/jamanetworkopen.2022.51506), 2023-01-19

## Supplemental Online Content

Jeong SM, Park J, Han K, et al. Association of changes in smoking intensity with risk of dementia in Korea. *JAMA Netw Open*. 2023;6(1):e2251506. doi:10.1001/jamanetworkopen.2022.51506

**eMethods.** Information on Covariates in the Study

**eTable 1.** Previous Studies of the Relationship Between Change in Cigarette Smoking Behavior and Incidence of Dementia

**eTable 2.** The Frequent Missing Variables

**eTable 3.** Questionnaire on Smoking Status in Korean National Health Screening Examinations

**eTable 4.** Association Between Categorical Change in Cigarette Smoking Intensity and Risk of Dementia

**eTable 5.** Baseline Characteristics of the Study Population Between Inclusion and Exclusion Group

**eTable 6.** Association Between Relative Changes in Cigarette Smoking Intensity and Risk of Dementia With Multiple Imputation

**eTable 7.** Association Between Relative Change in Cigarette Smoking Intensity and Risk of Dementia Stratified by Age

**eTable 8.** Association Between Relative Changes in Cigarette Smoking Intensity and Risk of Dementia Stratified by Sex

**eTable 9.** Association Between Relative Changes in Cigarette Smoking Intensity and Risk of Dementia Stratified by Alcohol Drinking Status

**eFigure 1.** Graphical Abstract of the Study

**eFigure 2.** Restricted Cubic Spline Curve for Association Between Changes in Smoking Intensity With Risk of Dementia

This supplementary material has been provided by the authors to give readers additional information about their work.

## eMethods. Information on Covariates in the Study

Information on covariates was assessed on the day of the second examination in 2011, which served as baseline. Alcohol consumption was classified into four levels: none, mild (<15g/day), moderate (15-30g/day), and heavy ( $\geq$ 30g/day). Daily alcohol intake was calculated by multiplying the average frequency of alcohol intake (per week) and the typical number of standard drinks on each occasion.<sup>1</sup> Regular exercise was defined as more than 30 minutes of moderate physical activity at least five times per week or more than 20 minutes of strenuous physical activity at least three times per week.<sup>2</sup> Body mass index was calculated as weight (kg) divided by height in meters squared ( $m^2$ ).

Comorbidities were defined using medical claims data before screening according to International Classification of Diseases (ICD-10) codes and relevant medications: for hypertension, I10-I13 or I15 and antihypertensive drugs or blood pressure  $\geq$ 140/90 mmHg; for diabetes, E11-E14 and anti-diabetic drugs or fasting glucose level  $\geq$ 126 mg/dL; for dyslipidemia, E78 + lipid lowering drugs or total cholesterol level  $\geq$ 240 mg/dL. Chronic kidney disease was defined as glomerular filtration rate  $<$ 60 ml/min/1.73m<sup>2</sup> as estimated by the Modification of Diet in Renal Disease equation. Household income was categorized into four quartiles based on insurance premium level. In Korea, insurance premium levels are determined based on income. Medical aid recipients (the poorest 3% of the population) were merged into the lowest income quintile.

## Reference

1. Yoo JE, Shin DW, Han K, et al. Association of the Frequency and Quantity of Alcohol Consumption With Gastrointestinal Cancer. *JAMA Netw Open*. Aug 2 2021;4(8):e2120382. doi:10.1001/jamanetworkopen.2021.20382
2. Anton SD, Duncan GE, Limacher MC, Martin AD, Perri MG. How much walking is needed to improve cardiorespiratory fitness? An examination of the 2008 Physical Activity Guidelines for Americans. *Res Q Exerc Sport*. Jun 2011;82(2):365-70. doi:10.1080/02701367.2011.10599766

**eTable 1. Previous Studies of the Relationship Between Change in Cigarette Smoking Behavior and the Incidence of Dementia**

| Author (year)                                           | Study design /country                                 | Number of subjects | Age range (years)                   | Follow-up (years)     | Adjustment                                                                                                                                                                                                    | Outcomes                                                                                                                             | Number of cases | Smoking assessment                                                                                                          | Group                                                                                                                                                 | Result [HR (95%CI)]                                                                                                                                                      |
|---------------------------------------------------------|-------------------------------------------------------|--------------------|-------------------------------------|-----------------------|---------------------------------------------------------------------------------------------------------------------------------------------------------------------------------------------------------------|--------------------------------------------------------------------------------------------------------------------------------------|-----------------|-----------------------------------------------------------------------------------------------------------------------------|-------------------------------------------------------------------------------------------------------------------------------------------------------|--------------------------------------------------------------------------------------------------------------------------------------------------------------------------|
| With two times of separate smoking cessation assessment |                                                       |                    |                                     |                       |                                                                                                                                                                                                               |                                                                                                                                      |                 |                                                                                                                             |                                                                                                                                                       |                                                                                                                                                                          |
| Choi et al (2018)                                       | Retrospective cohort study<br><br>/Korea              | 46,140             | ≥ 60 (2002-2013)                    | 8 (mean years 7.11)   | Age, BMI, BP, Fasting glucose, total cholesterol, physical activity, drinking habit, household income, Charlson Comorbidity Index                                                                             | Dementia (ICD-10 codes F00-F03, G30-G32)                                                                                             | 1,644           | Questionnaire from both the first and second health examinations.                                                           | Continual smoker<br>Short-term quitter (quit <4years)<br>Long-term quitter (quit ≥4years)<br>Never smoker                                             | 1.00 (ref)<br>0.87 (0.72–1.05)<br>0.86 (0.75–0.99)<br>0.81 (0.71–0.91)                                                                                                   |
| Deal et al (2020)                                       | Prospective cohort study (ARIC study)<br><br>/USA     | 13,002             | 45-64 (from 1987-1989 to 2011-2013) | Up to 12 (5 year lag) | Age, sex, education, a combination variable of race and study site, BMI, history of stroke, diabetes, hypertension and COPD.                                                                                  | Dementia (standardized algorithms confirmed by expert panel review at the visit or Modified TICS-modified interview on modified CDR) | 1,347           | Self-reported cigarette smoking status during annual follow-up telephone calls from visit 1 (1987-89) and visit 4 (1996-98) | Current smoker<br>Former smoker (quit < 4years ago)<br>Former smoker (quit ≥9years ago)<br>Never smoker                                               | 1.40 (1.02–1.92)<br>1.34 (0.91–1.99)<br>1.13 (0.91–1.39)<br>1.00 (ref)                                                                                                   |
| Based on self-reported smoking history                  |                                                       |                    |                                     |                       |                                                                                                                                                                                                               |                                                                                                                                      |                 |                                                                                                                             |                                                                                                                                                       |                                                                                                                                                                          |
| Lu et al (2020)                                         | Cohort study (Ohsaki Cohort 2006 study)<br><br>/Japan | 12,489             | ≥ 65 (2006-2007)                    | 5.7                   | BMI, time spent walking, alcohol drinking status, history of diseases (stroke, myocardial infarction, hypertension or diabetes) education level, psychological distress, cognitive function (kihon checklist) | Dementia (LTCI system criteria)                                                                                                      | 1,110           | Questionnaire at the baseline                                                                                               | Current smoker<br>Ex-smoker ( ≤2 years<br>3-5 years<br>6-10 years<br>11-15 years<br>>15 years )<br>Never smoker                                       | 1.46 (1.17–1.80)<br>1.39 (0.96–2.01)<br>1.03 (0.70–1.53)<br>1.04 (0.74–1.45)<br>1.19 (0.84–1.69)<br>0.92 (0.73–1.15)<br>1.00 (ref)                                       |
| Johnson et al (2021)                                    | Cohort study (from NACC UDS)<br><br>/USA              | 33,444             | ≥ 45 (2005-2018)                    | 14                    | Sex, education, diabetes status, hypertension status.                                                                                                                                                         | Dementia (clinical evaluation, CDR global score ≥ 1)                                                                                 | 806             | Interview at visit                                                                                                          | Never smoker<br>Former smoker<br>Current smoker<br><br>Never smoker<br>Quit < 10years<br>Quit 10 to <20years<br>Quit 20 to <30years<br>Quit ≥ 30years | 1.000 (ref)<br>0.845 (0.730–0.978)<br>1.656 (1.181–2.321)<br><br>1.000 (ref)<br>1.171 (0.728–1.885)<br>1.206 (0.883–1.646)<br>0.790 (0.597-1.046)<br>0.780 (0.655-0.930) |

AD, Alzheimer's disease; VaD, Vascular Dementia; DSM, Diagnostic and Statistical Manual of Mental Disorders; RR, risk ratio; HR, hazard ratio; OR, odds ratio; BP, blood pressure; BMI, body mass index; COPD, chronic obstructive pulmonary disease; LTCI, long-term care insurance; TICS, telephone interview for cognitive status; CDR, clinical dementia rating. Statistically significant values are marked in bold.

**eTable 2. The Frequent Missing Variables**

| <b>Variables</b>          | <b>Missing (%)</b> |
|---------------------------|--------------------|
| Age                       | 0.01               |
| Sex                       | 0.01               |
| Residence place           | 0.02               |
| smoking status in 2009    | 16.04              |
| Alcohol consumption       | 2.06               |
| Regular physical activity | 1.02               |
| Income                    | 19.11              |
| Diabetes mellitus         | 0.07               |
| Hypertension              | 0.06               |
| Dyslipidemia              | 0.06               |
| Chronic kidney disease    | 0.08               |
| Body mass index           | 0.05               |
| Weight                    | 0.05               |
| Height                    | 0.05               |
| Waist circumference       | 0.12               |
| Systolic blood pressure   | 0.07               |
| Diastolic blood pressure  | 0.07               |
| Glucose                   | 0.08               |
| Total cholesterol         | 0.07               |
| HDL-C                     | 0.07               |
| LDL-C                     | 14.0               |
| GFR                       | 0.08               |

HDL, high-density lipoprotein-cholesterol; LDL, low-density lipoprotein-cholesterol; GFR, glomerular filtration rate.

**eTable 3. Questionnaire on Smoking Status in Korean National Health Screening Examinations**

|                                                                                                                                                                                                                                 |
|---------------------------------------------------------------------------------------------------------------------------------------------------------------------------------------------------------------------------------|
| 1-1. Have you smoked at least 100 cigarettes in your entire life?                                                                                                                                                               |
| a. No<br>b. Yes, I used to smoke but I stopped ☞ (Go to the question 1-2)<br>c. Yes, I'm still smoking ☞ (Go to the question 1-3)                                                                                               |
| 1-2. If you used to smoke but stopped, please answer the following.,<br>How long had you smoked before quitting? Total _____ years<br>At that time, how many cigarettes did you usually smoke per day? _____ cigarettes per day |
| 1-3. If you are still smoking, please answer the following.<br>How long have you been smoking? Total _____ years<br>How many cigarettes do you usually smoke per day? _____ cigarettes per day                                  |

**eTable 4. Association Between Categorical Changes in Cigarette Smoking Intensity and Risk of Dementia**

| Smoking Status                                |               | No. (%)        | Case No. | Duration  | IR  | Crude model<br>HR (95% CI) | Age-adjusted<br>model<br>aHR <sup>a</sup> (95% CI) | Multivariate model<br>aHR <sup>b</sup> (95% CI) |
|-----------------------------------------------|---------------|----------------|----------|-----------|-----|----------------------------|----------------------------------------------------|-------------------------------------------------|
| 2009                                          | 2011          |                |          |           |     |                            |                                                    |                                                 |
| <b>All Dementia (Total)</b>                   |               |                |          |           |     |                            |                                                    |                                                 |
| All current smokers<br>(N=789,532)            | Non (quitter) | 114,959 (14.6) | 1,730    | 722,407   | 2.4 | 1 (Ref.)                   | 1 (Ref.)                                           | 1 (Ref.)                                        |
|                                               | Mild          | 60,417 (7.7)   | 2,056    | 374,027   | 5.5 | 2.30 (2.16-2.45)           | 1.33 (1.25-1.42)                                   | 1.24 (1.17-1.33)                                |
|                                               | Moderate      | 262,132 (33.2) | 3,866    | 1,640,146 | 2.4 | 0.99 (0.93-1.05)           | 1.17 (1.10-1.23)                                   | 1.12 (1.06-1.19)                                |
|                                               | Heavy         | 352,024 (44.6) | 4,260    | 2,201,224 | 1.9 | 0.81 (0.77-0.86)           | 1.23 (1.16-1.30)                                   | 1.16 (1.09-1.22)                                |
| Mild smokers,<br><10 CPD<br>(N=69,292)        | Non (quitter) | 18,417 (26.6)  | 435      | 115,189   | 3.8 | 0.67 (0.60-0.75)           | 0.88 (0.79-0.98)                                   | 0.91 (0.81-1.02)                                |
|                                               | Mild          | 31,428 (45.4)  | 1095     | 194,452   | 5.6 | 1 (Ref.)                   | 1 (Ref.)                                           | 1 (Ref.)                                        |
|                                               | Moderate      | 15,387 (22.2)  | 432      | 95,463    | 4.5 | 0.80 (0.72-0.90)           | 1.05 (0.94-1.17)                                   | 1.05 (0.94-1.18)                                |
|                                               | Heavy         | 4,060 (5.9)    | 120      | 25,101    | 4.8 | 0.85 (0.70-1.03)           | 1.25 (1.03-1.51)                                   | 1.24 (1.02-1.50)                                |
| Moderate smokers,<br>10-19 CPD<br>(N=295,770) | Non (quitter) | 47,357 (16.0)  | 637      | 298,035   | 2.1 | 1.04 (0.95-1.13)           | 0.85 (0.78-0.93)                                   | 0.89 (0.81-0.97)                                |
|                                               | Mild          | 22,635 (7.7)   | 764      | 140,252   | 5.4 | 2.65 (2.44-2.87)           | 1.30 (1.20-1.41)                                   | 1.26 (1.16-1.37)                                |
|                                               | Moderate      | 174,194 (58.9) | 2,242    | 1,092,041 | 2.1 | 1 (Ref.)                   | 1 (Ref.)                                           | 1 (Ref.)                                        |
|                                               | Heavy         | 51,584 (17.4)  | 773      | 322,098   | 2.4 | 1.17 (1.08-1.27)           | 1.26 (1.16-1.37)                                   | 1.24 (1.14-1.35)                                |
| Heavy Smokers,<br>≥ 20 CPD<br>(N=424,470)     | Non (quitter) | 49,185 (11.6)  | 658      | 309,183   | 2.1 | 1.16 (1.07-1.27)           | 0.86 (0.79-0.93)                                   | 0.92 (0.85-1.01)                                |
|                                               | Mild          | 6,354 (1.5)    | 197      | 39,324    | 5.0 | 2.74 (2.38-3.17)           | 1.30 (1.12-1.50)                                   | 1.33 (1.15-1.54)                                |
|                                               | Moderate      | 72,551 (17.1)  | 1,192    | 452,642   | 2.6 | 1.45 (1.36-1.55)           | 1.11 (1.04-1.19)                                   | 1.13 (1.06-1.21)                                |
|                                               | Heavy         | 296,380 (69.8) | 3,367    | 1,854,025 | 1.8 | 1 (Ref.)                   | 1 (Ref.)                                           | 1 (Ref.)                                        |
| <b>Alzheimer's dementia</b>                   |               |                |          |           |     |                            |                                                    |                                                 |
| All current smokers<br>(N=789,532)            | Non (quitter) | 114,959 (14.6) | 1,314    | 722,407   | 1.8 | 1 (Ref.)                   | 1 (Ref.)                                           | 1 (Ref.)                                        |
|                                               | Mild          | 60,417 (7.7)   | 1,599    | 374,027   | 4.3 | 2.35 (2.19-2.53)           | 1.30 (1.21-1.40)                                   | 1.21 (1.12-1.30)                                |
|                                               | Moderate      | 262,132 (33.2) | 2,836    | 1,640,146 | 1.7 | 0.96 (0.90-1.02)           | 1.13 (1.06-1.21)                                   | 1.08 (1.01-1.16)                                |
|                                               | Heavy         | 352,024 (44.6) | 3,051    | 2,201,224 | 1.4 | 0.77 (0.72-0.82)           | 1.20 (1.12-1.28)                                   | 1.13 (1.06-1.20)                                |
| Mild smokers,<br><10 CPD<br>(N=69,292)        | Non (quitter) | 18,417 (26.6)  | 357      | 115,189   | 3.1 | 0.71 (0.63-0.81)           | 0.95 (0.84-1.08)                                   | 1.00 (0.88-1.13)                                |
|                                               | Mild          | 31,428 (45.4)  | 842      | 194,452   | 4.3 | 1 (Ref.)                   | 1 (Ref.)                                           | 1 (Ref.)                                        |
|                                               | Moderate      | 15,387 (22.2)  | 332      | 95,463    | 3.5 | 0.80 (0.71-0.91)           | 1.07 (0.94-1.21)                                   | 1.07 (0.94-1.22)                                |
|                                               | Heavy         | 4,060 (5.9)    | 95       | 25,101    | 3.8 | 0.88 (0.71-1.08)           | 1.33 (1.07-1.64)                                   | 1.33 (1.07-1.64)                                |
| Moderate smokers,<br>10-19 CPD<br>(N=295,770) | Non (quitter) | 47,357 (16.0)  | 469      | 298,035   | 1.6 | 1.04 (0.94-1.15)           | 0.85 (0.77-0.94)                                   | 0.89 (0.80-0.98)                                |
|                                               | Mild          | 22,635 (7.7)   | 607      | 140,252   | 4.3 | 2.86 (2.60-3.13)           | 1.35 (1.23-1.48)                                   | 1.31 (1.19-1.44)                                |
|                                               | Moderate      | 174,194 (58.9) | 1,649    | 1,092,041 | 1.5 | 1 (Ref.)                   | 1 (Ref.)                                           | 1 (Ref.)                                        |
|                                               | Heavy         | 51,584 (17.4)  | 540      | 322,098   | 1.7 | 1.11 (1.01-1.23)           | 1.21 (1.10-1.34)                                   | 1.19 (1.08-1.31)                                |
| Heavy Smokers,<br>≥ 20 CPD<br>(N=424,470)     | Non (quitter) | 49,185 (11.6)  | 488      | 309,183   | 1.6 | 1.20 (1.09-1.33)           | 0.87 (0.79-0.96)                                   | 0.93 (0.84-1.03)                                |
|                                               | Mild          | 6,354 (1.5)    | 150      | 39,324    | 3.8 | 2.91 (2.46-3.43)           | 1.28 (1.08-1.51)                                   | 1.31 (1.11-1.55)                                |
|                                               | Moderate      | 72,551 (17.1)  | 855      | 452,642   | 1.9 | 1.45 (1.34-1.57)           | 1.08 (1.00-1.16)                                   | 1.10 (1.01-1.19)                                |
|                                               | Heavy         | 296,380 (69.8) | 2,416    | 1,854,025 | 1.3 | 1 (Ref.)                   | 1 (Ref.)                                           | 1 (Ref.)                                        |
| <b>Vascular dementia</b>                      |               |                |          |           |     |                            |                                                    |                                                 |
|                                               | Non (quitter) | 114,959 (14.6) | 245      | 722,407   | 0.3 | 1 (Ref.)                   | 1 (Ref.)                                           | 1 (Ref.)                                        |

|                                               |               |                |     |           |     |                  |                  |                  |
|-----------------------------------------------|---------------|----------------|-----|-----------|-----|------------------|------------------|------------------|
| All current smokers<br>(N=789,532)            | Mild          | 60,417 (7.7)   | 259 | 374,027   | 0.7 | 2.05 (1.72-2.44) | 1.42 (1.19-1.69) | 1.37 (1.15-1.64) |
|                                               | Moderate      | 262,132 (33.2) | 620 | 1,640,146 | 0.4 | 1.12 (0.96-1.30) | 1.30 (1.12-1.50) | 1.26 (1.09-1.47) |
|                                               | Heavy         | 352,024 (44.6) | 765 | 2,201,224 | 0.3 | 1.03 (0.89-1.19) | 1.36 (1.18-1.58) | 1.29 (1.11-1.49) |
| Mild smokers,<br><10 CPD<br>(N=69,292)        | Non (quitter) | 18,417 (26.6)  | 44  | 115,189   | 0.4 | 0.53 (0.38-0.74) | 0.64 (0.46-0.90) | 0.64 (0.45-0.90) |
|                                               | Mild          | 31,428 (45.4)  | 140 | 194,452   | 0.7 | 1 (Ref.)         | 1 (Ref.)         | 1 (Ref.)         |
|                                               | Moderate      | 15,387 (22.2)  | 61  | 95,463    | 0.6 | 0.89 (0.66-1.20) | 1.08 (0.80-1.46) | 1.06 (0.78-1.43) |
|                                               | Heavy         | 4,060 (5.9)    | 15  | 25,101    | 0.6 | 0.83 (0.49-1.42) | 1.07 (0.62-1.82) | 1.00 (0.58-1.71) |
| Moderate smokers,<br>10-19 CPD<br>(N=295,770) | Non (quitter) | 47,357 (16.0)  | 102 | 298,035   | 0.3 | 1.09 (0.87-1.36) | 0.93 (0.74-1.15) | 0.93 (0.75-1.17) |
|                                               | Mild          | 22,635 (7.7)   | 92  | 140,252   | 0.7 | 2.09 (1.66-2.63) | 1.23 (0.97-1.55) | 1.22 (0.96-1.54) |
|                                               | Moderate      | 174,194 (58.9) | 342 | 1,092,041 | 0.3 | 1 (Ref.)         | 1 (Ref.)         | 1 (Ref.)         |
|                                               | Heavy         | 51,584 (17.4)  | 149 | 322,098   | 0.5 | 1.48 (1.22-1.79) | 1.53 (1.26-1.86) | 1.50 (1.23-1.82) |
| Heavy Smokers,<br>≥ 20 CPD<br>(N=424,470)     | Non (quitter) | 49,185 (11.6)  | 99  | 309,183   | 0.3 | 0.98 (0.80-1.22) | 0.78 (0.63-0.97) | 0.85 (0.68-1.05) |
|                                               | Mild          | 6,354 (1.5)    | 27  | 39,324    | 0.7 | 2.11 (1.44-3.11) | 1.28 (0.87-1.88) | 1.30 (0.88-1.92) |
|                                               | Moderate      | 72,551 (17.1)  | 217 | 452,642   | 0.5 | 1.48 (1.27-1.73) | 1.26 (1.08-1.47) | 1.29 (1.10-1.51) |
|                                               | Heavy         | 296,380 (69.8) | 601 | 1,854,025 | 0.3 | 1 (Ref.)         | 1 (Ref.)         | 1 (Ref.)         |

IR, incidence rate; HR, hazard ratio; aHR, adjusted hazard ratio; CI, confidence interval; CPD, cigarettes per day.

<sup>a</sup>Adjusted for age.

<sup>b</sup>Adjusted for age, sex, income, alcohol, regular exercise, residence, hypertension, diabetes mellitus, dyslipidemia, chronic kidney disease, and body mass index.



**eTable 5. Baseline Characteristics of the Study Population Between Inclusion and Exclusion Group**

| Variable (SD)                        | Inclusion<br>(N = 789,532) | Exclusion<br>(N = 117,739) | p-value |
|--------------------------------------|----------------------------|----------------------------|---------|
| Mean age, years                      | 52.2 ± 8.5                 | 52.9 ± 9.0                 | < 0.001 |
| Sex                                  |                            |                            |         |
| Male, No. (%)                        | 756,469 (95.8)             | 104,269 (88.6)             | < 0.001 |
| Alcohol consumption, No. (%)         |                            |                            |         |
| Non                                  | 203,562 (25.8)             | 46,382 (40.2)              | < 0.001 |
| Mild                                 | 278,957 (35.3)             | 33,959 (29.4)              |         |
| Moderate                             | 178,391 (22.6)             | 20,136 (17.5)              |         |
| Heavy                                | 128,622 (16.3)             | 14,837 (12.9)              |         |
| Regular physical activity, No. (%)   |                            |                            |         |
| Non                                  | 632,538 (80.1)             | 92,039 (79.0)              | < 0.001 |
| Vigorous or Moderate                 | 119,160 (15.1)             | 18,507 (15.9)              |         |
| Vigorous and Moderate                | 37,834 (4.8)               | 5,987 (5.1)                |         |
| Anthropometrics                      |                            |                            |         |
| Height, cm                           | 168.4 ± 6.4                | 167.3 ± 7.3                | < 0.001 |
| Weight, kg                           | 68.0 ± 10.2                | 68.0 ± 10.7                | < 0.001 |
| Waist Circumference, cm              | 83.5 ± 7.7                 | 83.7 ± 7.9                 | < 0.001 |
| Body mass index, kg/m <sup>2</sup>   | 23.9 ± 3.0                 | 24.2 ± 3.0                 | < 0.001 |
| Systolic Blood Pressure, mmHg        | 124.4 ± 14.3               | 125.0 ± 14.6               | < 0.001 |
| Diastolic Blood Pressure, mmHg       | 78.2 ± 9.8                 | 78.4 ± 9.9                 | < 0.001 |
| Comorbidity                          |                            |                            |         |
| Hypertension, No (%)                 | 241,806 (30.6)             | 17,529 (14.9)              | < 0.001 |
| Diabetes Mellitus, No (%)            | 103,139 (13.1)             | 38,206 (32.5)              | < 0.001 |
| Dyslipidemia, No (%)                 | 160,062 (20.3)             | 28,891 (24.6)              | < 0.001 |
| Chronic Kidney Disease, No (%)       | 31,577 (4.0)               | 5,278 (4.5)                | < 0.001 |
| Laboratory findings                  |                            |                            |         |
| Glucose, mg/dL                       | 102.2 ± 27.6               | 104.7 ± 31.0               | < 0.001 |
| Cholesterol, mg/dL                   | 198.2 ± 36.1               | 202.9 ± 40.5               | < 0.001 |
| HDL, mg/dL                           | 52.1 ± 16.8                | 51.5 ± 17.5                | < 0.001 |
| LDL, mg/dL                           | 114.5 ± 35.3               | 115.6 ± 36.3               | < 0.001 |
| GFR, mL/min/1.73m <sup>2</sup>       | 88.9 ± 37.4                | 88.2 ± 32.2                | < 0.001 |
| Urban residency, No. (%)             | 355,838 (45.1)             | 51,151 (43.5)              | < 0.001 |
| Household Income, No (%)             |                            |                            |         |
| Q1(lowest)                           | 147,697 (18.7)             | 16,183 (17.0)              | < 0.001 |
| Q2                                   | 134,155 (17.0)             | 16,244 (17.1)              |         |
| Q3                                   | 213,459 (27.0)             | 23,422 (24.6)              |         |
| Q4(highest)                          | 294,221 (37.3)             | 39,390 (41.4)              |         |
| Smoking status in 2009, No. (%)      |                            |                            |         |
| Mild, <10 cigarettes/day             | 69,292 (8.8)               | 15,753 (15.9)              | < 0.001 |
| Moderate, 10-19 cigarettes/day       | 295,770 (37.5)             | 36,226 (36.6)              |         |
| Heavy, ≥20 cigarettes/day            | 424,470 (53.8)             | 46,873 (47.4)              |         |
| Duration of smoking in 2009, No. (%) |                            |                            |         |
| <5 y                                 | 18,674 (2.4)               | 6,248 (6.3)                | < 0.001 |
| 5-9 y                                | 18,229 (2.3)               | 4,207 (4.2)                |         |
| 10-19 y                              | 119,613 (15.2)             | 17,628 (17.8)              |         |
| 20-29 y                              | 361,970 (45.9)             | 39,456 (39.8)              |         |
| ≥30 y                                | 271,046 (34.3)             | 31,614 (31.9)              |         |
| PY of smoking in 2009, No. (%)       |                            |                            |         |
| <10 PY                               | 129,430 (16.4)             | 23,507 (25.4)              | < 0.001 |
| 10 to <20 PY                         | 227,456 (28.8)             | 24,562 (26.6)              |         |
| 20 to <30 PY                         | 222,228 (28.2)             | 22,724 (24.6)              |         |
| ≥30 PY                               | 210,418 (26.7)             | 21,663 (23.4)              |         |
| Smoking status in 2011, No. (%)      |                            |                            |         |
| Non, 0 cigarette/day                 | 114,959 (14.6)             | 10,220 (18.9)              | < 0.001 |
| Mild, <10 cigarettes/day             | 60,417 (7.7)               | 3,930 (7.3)                |         |
| Moderate, 10-19 cigarettes/day       | 262,132 (33.2)             | 16,960 (31.3)              |         |
| Heavy, ≥20 cigarettes/day            | 352,024 (44.6)             | 23,023 (42.5)              |         |

|                                      |                |               |         |
|--------------------------------------|----------------|---------------|---------|
| Duration of smoking in 2011, No. (%) |                |               |         |
| <5 y                                 | 125,034 (15.8) | 1,694 (3.2)   | < 0.001 |
| 5-9 y                                | 13,652 (1.7)   | 1,043 (2.0)   |         |
| 10-19 y                              | 83,989 (10.6)  | 6,687 (12.7)  |         |
| 20-29 y                              | 294,061 (37.2) | 23,634 (45.0) |         |
| ≥30 y                                | 272,796 (34.6) | 19,464 (37.1) |         |
| PY of smoking in 2011, No. (%)       |                |               |         |
| <10 PY                               | 124,411 (15.8) | 10,797 (17.5) | < 0.001 |
| 10 to <20 PY                         | 224,677 (28.5) | 17,600 (28.5) |         |
| 20 to <30 PY                         | 214,052 (27.1) | 16,977 (27.5) |         |
| ≥30 PY                               | 226,392 (28.7) | 16,462 (26.6) |         |

SD, standard deviation; HDL, high-density lipoprotein; LDL, low-density lipoprotein; GFR, glomerular filtration rate; PY, pack-years All variables were assess in second health exam (2011) except for smoking status of first health exam (2009)

**eTable 6. Association Between Relative Changes in Cigarette Smoking Intensity and Risk of Dementia With Multiple Imputation**

| Smoking Status                                |            | Multiple Imputation |
|-----------------------------------------------|------------|---------------------|
| 2009                                          | 2011       |                     |
| All Dementia (Total)                          |            |                     |
| All current smokers<br>(N=789,532)            | Quitter    | 0.90 (0.85-0.96)    |
|                                               | Reducer I  | 1.21 (1.13-1.29)    |
|                                               | Reducer II | 1.04 (0.98-1.10)    |
|                                               | Sustainer  | 1 (Ref.)            |
|                                               | Increaser  | 1.10 (1.05-1.15)    |
| Mild smokers,<br><10 CPD<br>(N=69,292)        | Quitter    | 0.95 (0.84-1.08)    |
|                                               | Reducer I  | 1.12 (0.86-1.48)    |
|                                               | Reducer II | 1.11 (0.98-1.25)    |
|                                               | Sustainer  | 1 (Ref.)            |
|                                               | Increaser  | 1.12 (1.00-1.24)    |
| Moderate smokers,<br>10-19 CPD<br>(N=295,770) | Quitter    | 0.88 (0.80-0.96)    |
|                                               | Reducer I  | 1.28 (1.15-1.43)    |
|                                               | Reducer II | 1.08 (0.99-1.17)    |
|                                               | Sustainer  | 1 (Ref.)            |
|                                               | Increaser  | 1.15 (1.06-1.24)    |
| Heavy Smokers,<br>≥ 20 CPD<br>(N=424,470)     | Quitter    | 0.90 (0.83-0.99)    |
|                                               | Reducer I  | 1.19 (1.10-1.27)    |
|                                               | Reducer II | 0.99 (0.91-1.08)    |
|                                               | Sustainer  | 1 (Ref.)            |
|                                               | Increaser  | 1.05 (0.94-1.18)    |
| Alzheimer's dementia                          |            |                     |
| All current smokers<br>(N=789,532)            | Quitter    | 0.93 (0.87-0.99)    |
|                                               | Reducer I  | 1.20 (1.12-1.30)    |
|                                               | Reducer II | 1.03 (0.97-1.10)    |
|                                               | Sustainer  | 1 (Ref.)            |
|                                               | Increaser  | 1.07 (1.01-1.14)    |
| Mild smokers,<br><10 CPD<br>(N=69,292)        | Quitter    | 1.02 (0.89-1.18)    |
|                                               | Reducer I  | 1.15 (0.88-1.50)    |
|                                               | Reducer II | 1.10 (0.97-1.28)    |
|                                               | Sustainer  | 1 (Ref.)            |
|                                               | Increaser  | 1.09 (0.96-1.22)    |
| Moderate smokers,<br>10-19 CPD<br>(N=295,770) | Quitter    | 0.88 (0.79-0.98)    |
|                                               | Reducer I  | 1.32 (1.18-1.48)    |
|                                               | Reducer II | 1.07 (0.97-1.19)    |
|                                               | Sustainer  | 1 (Ref.)            |
|                                               | Increaser  | 1.12 (1.02-1.23)    |
| Heavy Smokers,<br>≥ 20 CPD<br>(N=424,470)     | Quitter    | 0.91 (0.82-1.01)    |
|                                               | Reducer I  | 1.15 (1.06-1.25)    |
|                                               | Reducer II | 0.99 (0.90-1.09)    |
|                                               | Sustainer  | 1 (Ref.)            |
|                                               | Increaser  | 1.05 (0.91-1.22)    |
| Vascular dementia                             |            |                     |
| All current smokers<br>(N=789,532)            | Quitter    | 0.82 (0.71-0.94)    |
|                                               | Reducer I  | 1.18 (1.03-1.36)    |
|                                               | Reducer II | 1.07 (0.94-1.21)    |
|                                               | Sustainer  | 1 (Ref.)            |
|                                               | Increaser  | 1.15 (1.02-1.29)    |
| Mild smokers,<br><10 CPD<br>(N=69,292)        | Quitter    | 0.65 (0.44-0.96)    |
|                                               | Reducer I  | 0.79 (0.41-1.51)    |
|                                               | Reducer II | 0.95 (0.65-1.39)    |
|                                               | Sustainer  | 1 (Ref.)            |
|                                               | Increaser  | 1.09 (0.82-1.44)    |

|                                               |            |                  |
|-----------------------------------------------|------------|------------------|
| Moderate smokers,<br>10-19 CPD<br>(N=295,770) | Quitter    | 0.89 (0.71-1.12) |
|                                               | Reducer I  | 1.14 (0.79-1.64) |
|                                               | Reducer II | 1.14 (0.92-1.41) |
|                                               | Sustainer  | 1 (Ref.)         |
|                                               | Increaser  | 1.25 (1.03-1.51) |
| Heavy Smokers,<br>≥ 20 CPD<br>(N=424,470)     | Quitter    | 0.82 (0.66-1.02) |
|                                               | Reducer I  | 1.27 (1.07-1.50) |
|                                               | Reducer II | 1.05 (0.86-1.27) |
|                                               | Sustainer  | 1 (Ref.)         |
|                                               | Increaser  | 1.00 (0.77-1.29) |

Adjusted for age, sex, income, alcohol, regular exercise, residence, hypertension, diabetes mellitus, dyslipidemia, chronic kidney disease, and body mass index.

Reducer I (≥50% reduction), reducer II (20-50% reduction), sustainer sustainers (less than 20% reduction or less than 20% increase), or increaser (≥20% increase) from baseline cigarette per day.

**eTable 7. Association Between Relative Changes in Cigarette Smoking Intensity and Risk of Dementia Stratified by Age**

| Subgroup                    | Smoking status             |            |                | Sustained smoking at same level as a reference |           |      |                  |                   |
|-----------------------------|----------------------------|------------|----------------|------------------------------------------------|-----------|------|------------------|-------------------|
|                             | 2009                       | 2011       | No. (%)        | Case No.                                       | Duration  | IR   | aHR (95% CI)     | p for interaction |
| <b>All Dementia (Total)</b> |                            |            |                |                                                |           |      |                  |                   |
| Age (<65)                   | All Smokers<br>(N=709,933) | Quitter    | 100,843 (14.2) | 443                                            | 638,949   | 0.7  | 0.81 (0.73-0.90) | 0.003             |
|                             |                            | Reducer I  | 51,720 (7.3)   | 410                                            | 325,317   | 1.3  | 1.33 (1.19-1.48) |                   |
|                             |                            | Reducer II | 101,743 (14.3) | 509                                            | 640,697   | 0.8  | 1.02 (0.93-1.13) |                   |
|                             |                            | Sustainer  | 342,440 (48.2) | 1,748                                          | 2,156,155 | 0.8  | 1 (Ref.)         |                   |
|                             |                            | Increaser  | 113,187 (15.9) | 643                                            | 712,077   | 0.9  | 1.12 (1.03-1.23) |                   |
| Age (≥65)                   | All Smokers<br>(N=79,599)  | Quitter    | 14,116 (17.7)  | 1,287                                          | 83,458    | 15.4 | 0.97 (0.91-1.04) |                   |
|                             |                            | Reducer I  | 9,047 (11.4)   | 1,175                                          | 51,637    | 22.8 | 1.25 (1.16-1.33) |                   |
|                             |                            | Reducer II | 10,147 (12.7)  | 1,061                                          | 59,240    | 17.9 | 1.09 (1.02-1.17) |                   |
|                             |                            | Sustainer  | 33,953 (42.7)  | 3,210                                          | 199,127   | 16.1 | 1 (Ref.)         |                   |
|                             |                            | Increaser  | 12,336 (15.5)  | 1,426                                          | 71,148    | 20.0 | 1.13 (1.06-1.20) |                   |
| <b>Alzheimer's dementia</b> |                            |            |                |                                                |           |      |                  |                   |
| Age (<65)                   | All Smokers<br>(N=709,933) | Quitter    | 100,843 (14.2) | 281                                            | 638,949   | 0.4  | 0.80 (0.70-0.92) | 0.003             |
|                             |                            | Reducer I  | 51,720 (7.3)   | 271                                            | 325,317   | 0.8  | 1.35 (1.19-1.55) |                   |
|                             |                            | Reducer II | 101,743 (14.3) | 321                                            | 640,697   | 0.5  | 1.02 (0.90-1.16) |                   |
|                             |                            | Sustainer  | 342,440 (48.2) | 1,107                                          | 2,156,155 | 0.5  | 1 (Ref.)         |                   |
|                             |                            | Increaser  | 113,187 (15.9) | 386                                            | 712,077   | 0.5  | 1.06 (0.95-1.19) |                   |
| Age (≥65)                   | All Smokers<br>(N=79,599)  | Quitter    | 14,116 (17.7)  | 1,033                                          | 83,458    | 12.4 | 0.99 (0.92,1.06) |                   |
|                             |                            | Reducer I  | 9,047 (11.4)   | 920                                            | 51,637    | 17.8 | 1.23 (1.14-1.33) |                   |
|                             |                            | Reducer II | 10,147 (12.7)  | 841                                            | 59,240    | 14.2 | 1.09 (1.01-1.18) |                   |
|                             |                            | Sustainer  | 33,953 (42.7)  | 2,529                                          | 199,127   | 12.7 | 1 (Ref.)         |                   |
|                             |                            | Increaser  | 12,336 (15.5)  | 1,111                                          | 71,148    | 15.6 | 1.11 (1.04-1.19) |                   |
| <b>Vascular dementia</b>    |                            |            |                |                                                |           |      |                  |                   |
| Age (<65)                   | All Smokers<br>(N=709,933) | Quitter    | 100,843 (14.2) | 111                                            | 638,949   | 0.2  | 0.82 (0.66-1.01) | 0.955             |
|                             |                            | Reducer I  | 51,720 (7.3)   | 97                                             | 325,317   | 0.3  | 1.34 (1.08-1.68) |                   |
|                             |                            | Reducer II | 101,743 (14.3) | 137                                            | 640,697   | 0.2  | 1.10 (0.91-1.33) |                   |
|                             |                            | Sustainer  | 342,440 (48.2) | 434                                            | 2,156,155 | 0.2  | 1 (Ref.)         |                   |
|                             |                            | Increaser  | 113,187 (15.9) | 166                                            | 712,077   | 0.2  | 1.17 (0.98-1.40) |                   |
| Age (≥65)                   | All Smokers<br>(N=79,599)  | Quitter    | 14,116 (17.7)  | 134                                            | 83,458    | 1.6  | 0.86 (0.71-1.05) |                   |
|                             |                            | Reducer I  | 9,047 (11.4)   | 135                                            | 51,637    | 2.6  | 1.25 (1.03-1.52) |                   |
|                             |                            | Reducer II | 10,147 (12.7)  | 119                                            | 59,240    | 2.0  | 1.05 (0.86-1.29) |                   |
|                             |                            | Sustainer  | 33,953 (42.7)  | 380                                            | 199,127   | 1.9  | 1 (Ref.)         |                   |

|  |  |           |               |     |        |     |                  |
|--|--|-----------|---------------|-----|--------|-----|------------------|
|  |  | Increaser | 12,336 (15.5) | 176 | 71,148 | 2.5 | 1.21 (1.01-1.45) |
|--|--|-----------|---------------|-----|--------|-----|------------------|

IR, incidence rate; aHR, adjusted hazard ratio; CI, confidence interval.

Adjusted for age, sex, income, alcohol, regular exercise, residence, hypertension, diabetes mellitus, dyslipidemia, chronic kidney disease, and body mass index.

Reducer I ( $\geq 50\%$  reduction), reducer II (20-50% reduction), sustainer sustainers (less than 20% reduction or less than 20% increase), or increaser ( $\geq 20\%$  increase) from baseline cigarette per day.

**eTable 8. Association Between Relative Changes in Cigarette Smoking Intensity and Risk of Dementia Stratified by Sex**

| Subgroup                    | Smoking status             |            |                | Sustained smoking at same level as a reference |           |     |                  |                   |
|-----------------------------|----------------------------|------------|----------------|------------------------------------------------|-----------|-----|------------------|-------------------|
|                             | 2009                       | 2011       | No. (%)        | Case No.                                       | Duration  | IR  | aHR (95% CI)     | p for interaction |
| <b>All Dementia (Total)</b> |                            |            |                |                                                |           |     |                  |                   |
| Male                        | All Smokers<br>(N=756,469) | Quitter    | 110,148 (14.6) | 1,614                                          | 692,130   | 2.3 | 0.92 (0.87-0.98) | 0.357             |
|                             |                            | Reducer I  | 56,695 (7.5)   | 1,396                                          | 351,705   | 4.0 | 1.26 (1.19-1.34) |                   |
|                             |                            | Reducer II | 107,389 (14.2) | 1,403                                          | 671,823   | 2.1 | 1.04 (0.98-1.11) |                   |
|                             |                            | Sustainer  | 363,628 (48.1) | 4,560                                          | 2,275,321 | 2.0 | 1 (Ref.)         |                   |
|                             |                            | Increaser  | 118,609 (15.7) | 1,800                                          | 740,071   | 2.4 | 1.11 (1.06-1.18) |                   |
| Female                      | All Smokers<br>(N=33,063)  | Quitter    | 4,811 (14.6)   | 116                                            | 30,277    | 3.8 | 0.86 (0.69-1.05) |                   |
|                             |                            | Reducer I  | 4,072 (12.3)   | 189                                            | 25,249    | 7.5 | 1.17 (0.98-1.39) |                   |
|                             |                            | Reducer II | 4,501 (13.6)   | 167                                            | 28,114    | 5.9 | 1.17 (0.98-1.40) |                   |
|                             |                            | Sustainer  | 12,765 (38.6)  | 398                                            | 79,961    | 5.0 | 1 (Ref.)         |                   |
|                             |                            | Increaser  | 6,914 (20.9)   | 269                                            | 43,154    | 6.2 | 1.12 (0.96-1.30) |                   |
| <b>Alzheimer's dementia</b> |                            |            |                |                                                |           |     |                  |                   |
| Male                        | All Smokers<br>(N=756,469) | Quitter    | 110,148 (14.6) | 1,220                                          | 692,130   | 1.8 | 0.94 (0.88-1.01) | 0.247             |
|                             |                            | Reducer I  | 56,695 (7.5)   | 1,043                                          | 351,705   | 3.0 | 1.25 (1.17-1.34) |                   |
|                             |                            | Reducer II | 107,389 (14.2) | 1,026                                          | 671,823   | 1.5 | 1.04 (0.97-1.11) |                   |
|                             |                            | Sustainer  | 363,628 (48.1) | 3,323                                          | 2,275,321 | 1.5 | 1 (Ref.)         |                   |
|                             |                            | Increaser  | 118,609 (15.7) | 1,288                                          | 740,071   | 1.7 | 1.08 (1.01-1.15) |                   |
| Female                      | All Smokers<br>(N=33,063)  | Quitter    | 4,811 (14.6)   | 94                                             | 30,277    | 3.1 | 0.88 (0.70-1.11) |                   |
|                             |                            | Reducer I  | 4,072 (12.3)   | 148                                            | 25,249    | 5.9 | 1.15 (0.94-1.40) |                   |
|                             |                            | Reducer II | 4,501 (13.6)   | 136                                            | 28,114    | 4.8 | 1.21 (0.99-1.48) |                   |
|                             |                            | Sustainer  | 12,765 (38.6)  | 313                                            | 79,961    | 3.9 | 1 (Ref.)         |                   |
|                             |                            | Increaser  | 6,914 (20.9)   | 209                                            | 43,154    | 4.8 | 1.10 (0.92-1.31) |                   |
| <b>Vascular dementia</b>    |                            |            |                |                                                |           |     |                  |                   |
| Male                        | All Smokers<br>(N=756,469) | Quitter    | 110,148 (14.6) | 231                                            | 692,130   | 0.3 | 0.83 (0.72-0.97) | 0.797             |
|                             |                            | Reducer I  | 56,695 (7.5)   | 206                                            | 351,705   | 0.6 | 1.26 (1.08-1.48) |                   |
|                             |                            | Reducer II | 107,389 (14.2) | 234                                            | 671,823   | 0.3 | 1.05 (0.91-1.22) |                   |
|                             |                            | Sustainer  | 363,628 (48.1) | 769                                            | 2,275,321 | 0.3 | 1 (Ref.)         |                   |
|                             |                            | Increaser  | 118,609 (15.7) | 311                                            | 740,071   | 0.4 | 1.20 (1.05,1.37) |                   |
| Female                      | All Smokers<br>(N=33,063)  | Quitter    | 4,811 (14.6)   | 14                                             | 30,277    | 0.5 | 0.94 (0.52-1.72) |                   |
|                             |                            | Reducer I  | 4,072 (12.3)   | 26                                             | 25,249    | 1.0 | 1.54 (0.95-2.49) |                   |
|                             |                            | Reducer II | 4,501 (13.6)   | 22                                             | 28,114    | 0.8 | 1.37 (0.82-2.29) |                   |
|                             |                            | Sustainer  | 12,765 (38.6)  | 45                                             | 79,961    | 0.6 | 1 (Ref.)         |                   |
|                             |                            | Increaser  | 6,914 (20.9)   | 31                                             | 43,154    | 0.7 | 1.17 (0.74-1.85) |                   |

IR, incidence rate; aHR, adjusted hazard ratio; CI, confidence interval.

Adjusted for age, sex, income, alcohol, regular exercise, residence, hypertension, diabetes mellitus, dyslipidemia, chronic kidney disease, and body mass index.

Reducer I ( $\geq 50\%$  reduction), reducer II (20-50% reduction), sustainer sustainers (less than 20% reduction or less than 20% increase), or increaser ( $\geq 20\%$  increase) from baseline cigarette per day.



**eTable 9. Association Between Relative Changes in Cigarette Smoking Intensity and Risk of Dementia Stratified by Alcohol Drinking Status**

| Subgroup                    | Smoking status          |            |                | Sustained smoking at same level as a reference |           |     |                  |                   |
|-----------------------------|-------------------------|------------|----------------|------------------------------------------------|-----------|-----|------------------|-------------------|
|                             | 2009                    | 2011       | No. (%)        | Case No.                                       | Duration  | IR  | aHR (95% CI)     | p for interaction |
| <b>All Dementia (Total)</b> |                         |            |                |                                                |           |     |                  |                   |
| Alcohol drinker             | All Smokers (N=203,562) | Quitter    | 32,916 (16.2)  | 881                                            | 204,776   | 4.3 | 0.84 (0.77-0.90) | <0.001            |
|                             |                         | Reducer I  | 17,800 (8.7)   | 753                                            | 109,090   | 6.9 | 1.27 (1.17-1.37) |                   |
|                             |                         | Reducer II | 28,038 (13.8)  | 636                                            | 174,356   | 3.6 | 1.10 (1.02-1.18) |                   |
|                             |                         | Sustainer  | 93,169 (45.8)  | 2,000                                          | 579,717   | 3.4 | 1 (Ref.)         |                   |
|                             |                         | Increaser  | 31,639 (15.5)  | 897                                            | 196,038   | 4.6 | 1.10 (1.03-1.18) |                   |
| Non-drinker                 | All Smokers (N=585,970) | Quitter    | 82,043 (14.0)  | 849                                            | 517,631   | 1.6 | 1.02 (0.95-1.11) |                   |
|                             |                         | Reducer I  | 42,967 (7.3)   | 832                                            | 267,864   | 3.1 | 1.24 (1.14-1.35) |                   |
|                             |                         | Reducer II | 83,852 (14.3)  | 934                                            | 525,581   | 1.8 | 1.01 (0.92-1.10) |                   |
|                             |                         | Sustainer  | 283,224 (48.3) | 2,958                                          | 1,775,565 | 1.7 | 1 (Ref.)         |                   |
|                             |                         | Increaser  | 93,884 (16.0)  | 1,172                                          | 587,187   | 2.0 | 1.13 (1.05-1.22) |                   |
| <b>Alzheimer's dementia</b> |                         |            |                |                                                |           |     |                  |                   |
| Alcohol drinker             | All Smokers (N=203,562) | Quitter    | 32,916 (16.2)  | 702                                            | 204,776   | 3.4 | 0.82 (0.75-0.90) | <0.001            |
|                             |                         | Reducer I  | 17,800 (8.7)   | 585                                            | 109,090   | 5.4 | 1.23 (1.12-1.35) |                   |
|                             |                         | Reducer II | 28,038 (13.8)  | 506                                            | 174,356   | 2.9 | 1.06 (0.98-1.16) |                   |
|                             |                         | Sustainer  | 93,169 (45.8)  | 1,499                                          | 579,717   | 2.6 | 1 (Ref.)         |                   |
|                             |                         | Increaser  | 31,639 (15.5)  | 662                                            | 196,038   | 3.4 | 1.07 (0.98-1.16) |                   |
| Non-drinker                 | All Smokers (N=585,970) | Quitter    | 82,043 (14.0)  | 612                                            | 517,631   | 1.2 | 1.08 (0.99-1.18) |                   |
|                             |                         | Reducer I  | 42,967 (7.3)   | 606                                            | 267,864   | 2.3 | 1.26 (1.15-1.39) |                   |
|                             |                         | Reducer II | 83,852 (14.3)  | 656                                            | 525,581   | 1.2 | 1.06 (0.96-1.17) |                   |
|                             |                         | Sustainer  | 283,224 (48.3) | 2,137                                          | 1,775,565 | 1.2 | 1 (Ref.)         |                   |
|                             |                         | Increaser  | 93,884 (16.0)  | 835                                            | 587,187   | 1.4 | 1.10 (1.00-1.21) |                   |
| <b>Vascular dementia</b>    |                         |            |                |                                                |           |     |                  |                   |
| Alcohol drinker             | All Smokers (N=203,562) | Quitter    | 32,916 (16.2)  | 101                                            | 204,776   | 0.5 | 0.84 (0.70-1.01) | 0.147             |
|                             |                         | Reducer I  | 17,800 (8.7)   | 97                                             | 109,090   | 0.9 | 1.32 (1.09-1.60) |                   |
|                             |                         | Reducer II | 28,038 (13.8)  | 77                                             | 174,356   | 0.4 | 1.20 (1.01-1.42) |                   |
|                             |                         | Sustainer  | 93,169 (45.8)  | 289                                            | 579,717   | 0.5 | 1 (Ref.)         |                   |
|                             |                         | Increaser  | 31,639 (15.5)  | 139                                            | 196,038   | 0.7 | 1.13 (0.96-1.33) |                   |
| Non-drinker                 | All Smokers (N=585,970) | Quitter    | 82,043 (14.0)  | 144                                            | 517,631   | 0.3 | 0.84 (0.67-1.05) |                   |
|                             |                         | Reducer I  | 42,967 (7.3)   | 135                                            | 267,864   | 0.5 | 1.23 (0.98-1.55) |                   |
|                             |                         | Reducer II | 83,852 (14.3)  | 179                                            | 525,581   | 0.3 | 0.87 (0.68-1.12) |                   |

|  |  |           |                |  |     |           |     |                  |  |
|--|--|-----------|----------------|--|-----|-----------|-----|------------------|--|
|  |  | Sustainer | 283,224 (48.3) |  | 525 | 1,775,565 | 0.3 | 1 (Ref.)         |  |
|  |  | Increaser | 93,884 (16.0)  |  | 203 | 587,187   | 0.3 | 1.28 (1.05-1.57) |  |

IR, incidence rate; aHR, adjusted hazard ratio; CI, confidence interval.

Adjusted for age, sex, income, alcohol, regular exercise, residence, hypertension, diabetes mellitus, dyslipidemia, chronic kidney disease, and body mass index.

Reducer I ( $\geq 50\%$  reduction), reducer II (20-50% reduction), sustainer sustainers (less than 20% reduction or less than 20% increase), or increaser ( $\geq 20\%$  increase) from baseline cigarette per day

eFigure 1. Graphical Abstract of the Study

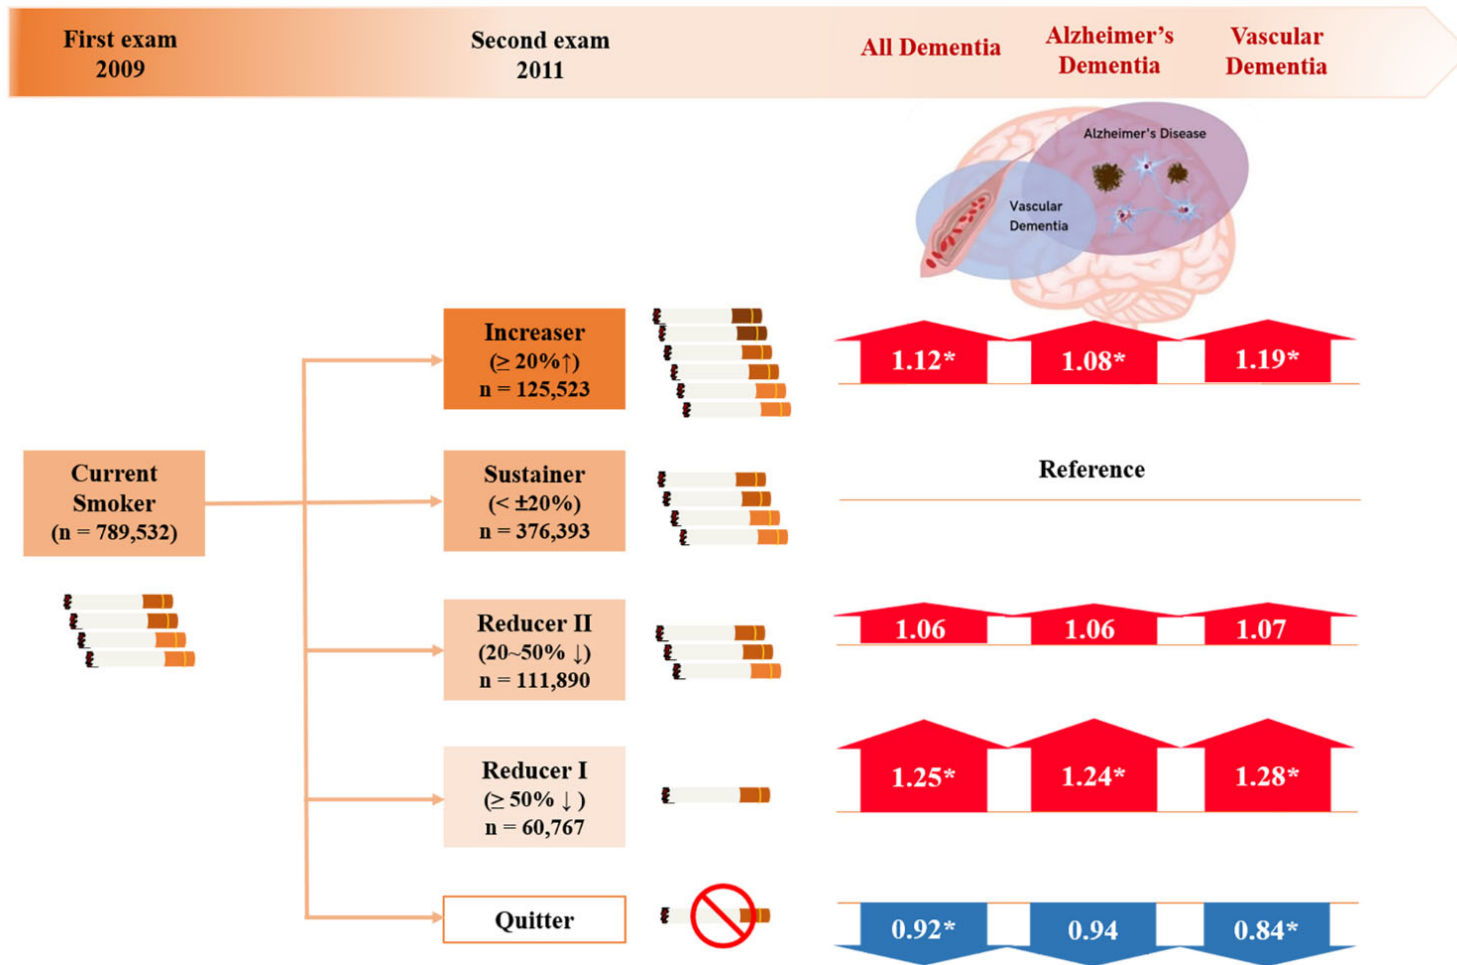

Smoking cessation, but not reduction, was associated with decreased risk of all dementia including Alzheimer's disease and vascular dementia

\* Statistical significance

**eFigure 2. Restricted Cubic Spline Curve for Association Between Changes in Smoking Intensity With Risk of Dementia**

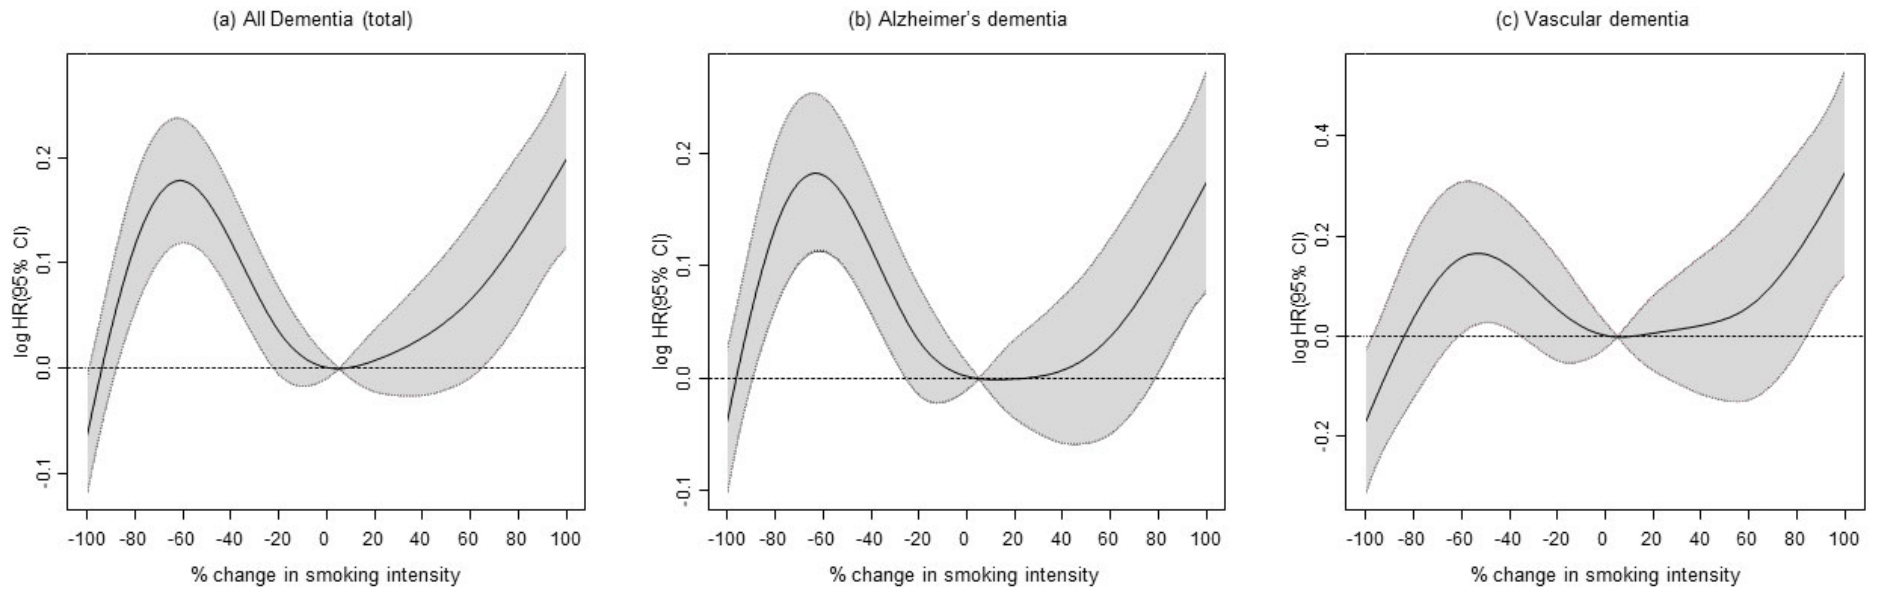

Supplement: jamanetwopen-e2251506-s001.pdf [file jamanetwopen-e2251506-s001.pdf]
