# Supplementary material for: Association of Changes in Smoking Intensity With Risk of Dementia in Korea
Source: PubMed Central journal article supplement (PMC9857334; doi:10.1001/jamanetworkopen.2022.51506), 2023-01-19
Supplement: jamanetwopen-e2251506-s002.pdf [file jamanetwopen-e2251506-s002.pdf]

## Data Sharing Statement

Jeong. Association of Changes in Smoking Intensity With Risk of Dementia in Korea. *JAMA Netw Open*. Published January 19, 2023. doi:10.1001/jamanetworkopen.2022.51506

### Data

**Data available:** No
